# Supplementary figures and images for: Optical properties and fluorescence quenching of biologically active ethyl 4-(4-N,N-dimethylamino phenyl)-2-methyl-5-oxo-4,5-dihydro-1H-indeno[1,2-b]pyridine-3-carboxylate (DDPC) dye as a probe to determine CMC of surfactants
Source: Royal Society of Chemistry journal article supplement (doi:10.1039/c6ra02814d), 2016-01-01

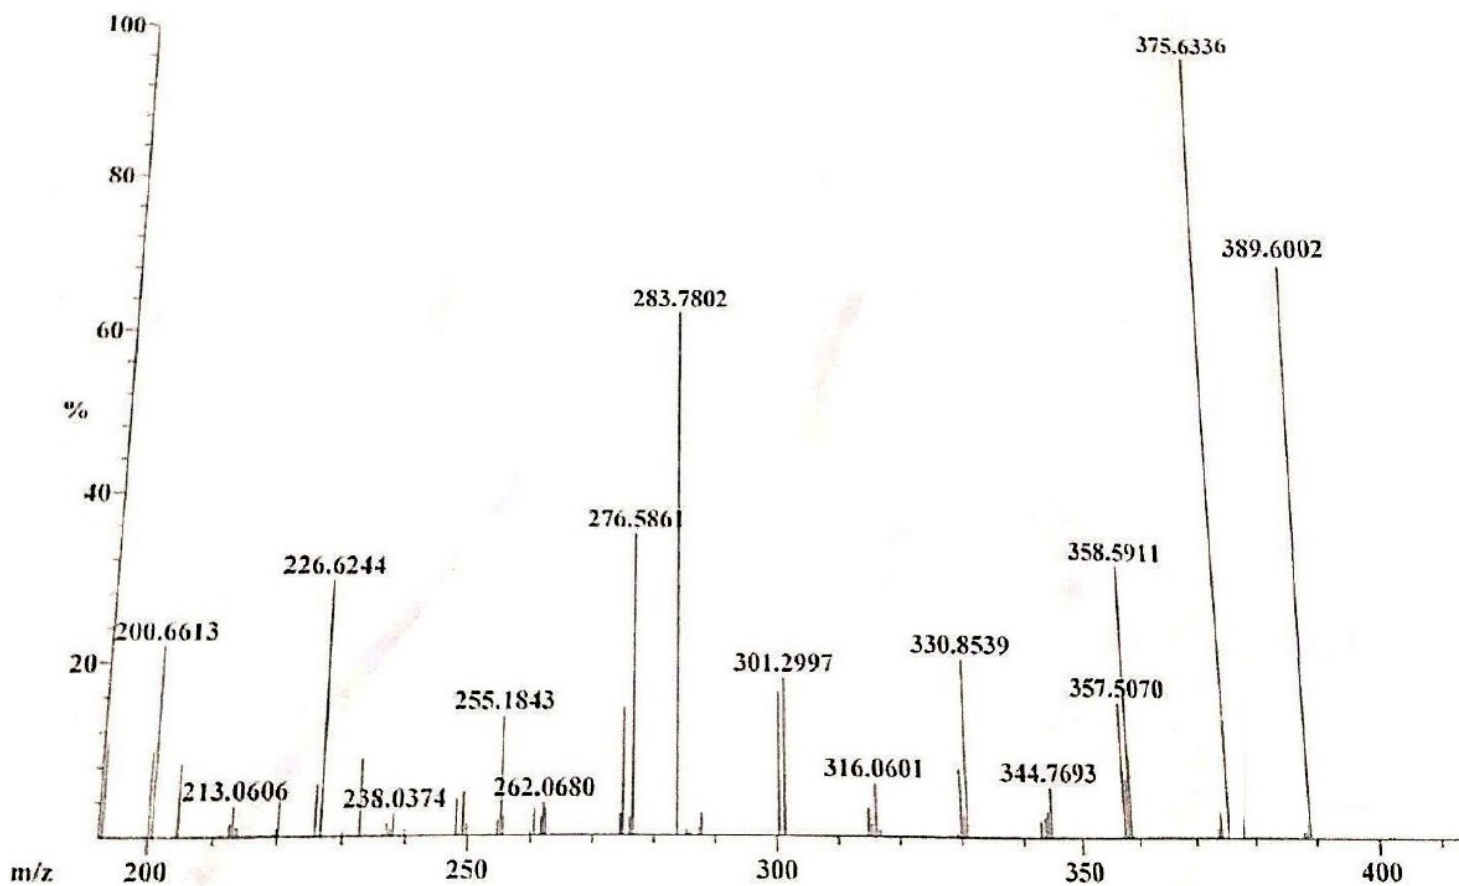

EI-MS spectra of DDPC.

Sample : S-1 CDCL3

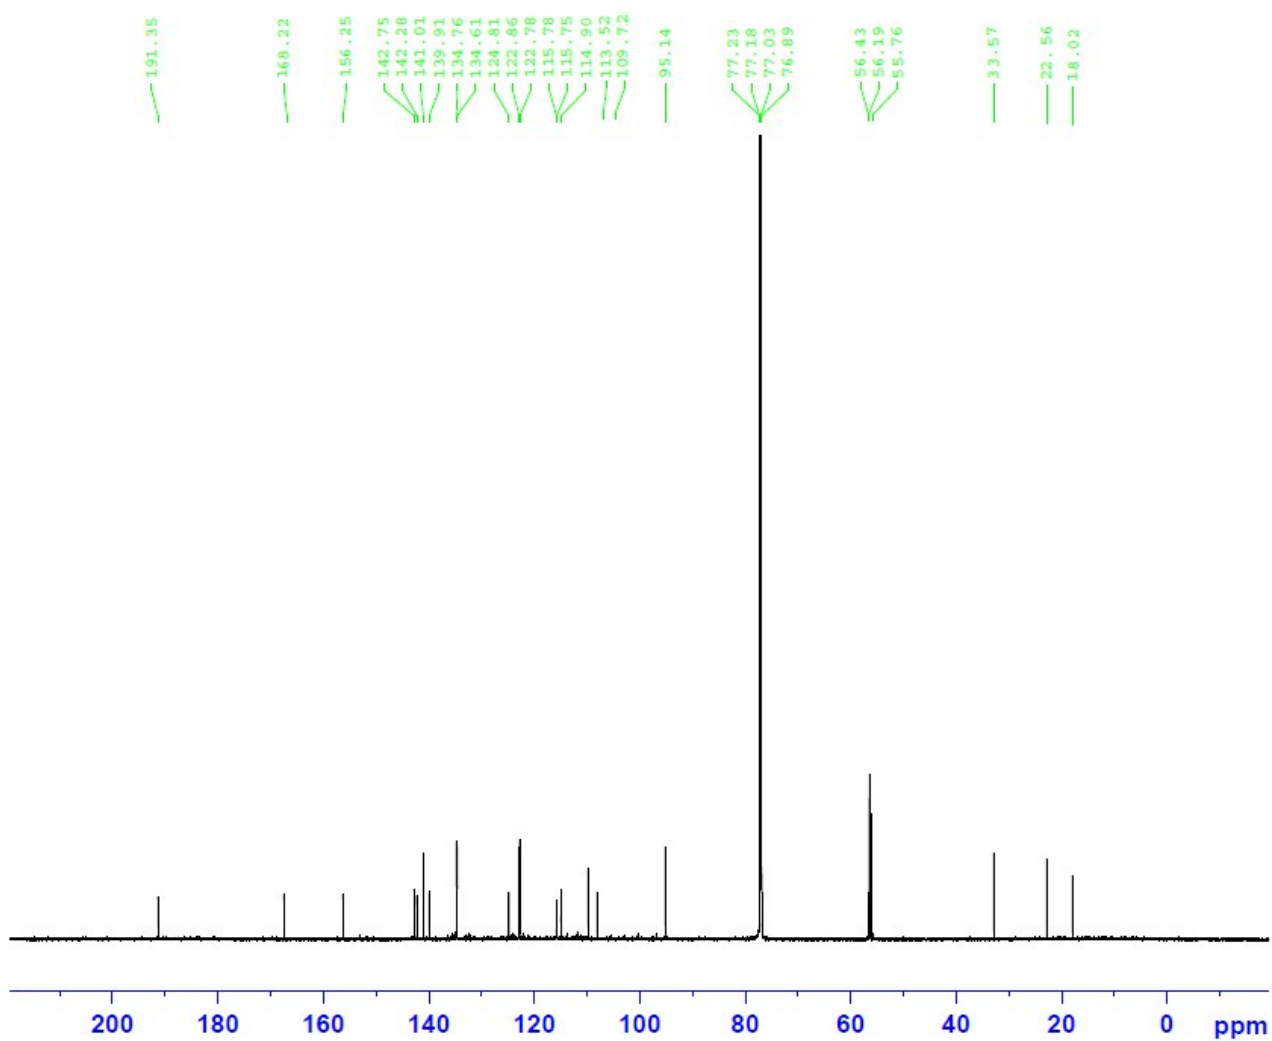

13C NMR spectra of DDPG.

Supplement: c6ra02814d1.pdf [file c6ra02814d1.pdf]
